# Supplementary material
Source: MDPI journal article supplement (https://www.mdpi.com/2073-4352/13/6/963)
Supplement: s1 [file s1]

# Supplementary file

**Figure S1:** Photo of the crystal on a nylon loop (a) and single frame of collected single-crystal X-Ray diffraction data (b).

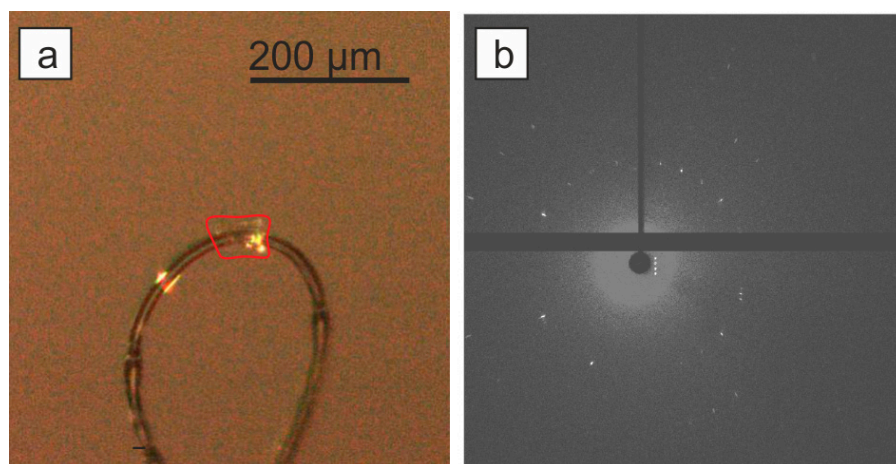

**Table S1.** Anisotropic displacement parameters ( $\text{\AA}^2$ ) for alunogen.

| Atom | $U_{11}$   | $U_{22}$   | $U_{33}$   | $U_{23}$    | $U_{13}$    | $U_{12}$    |
|------|------------|------------|------------|-------------|-------------|-------------|
| Al1  | 0.0170(6)  | 0.0187(5)  | 0.0148(5)  | -0.0004(4)  | 0.0036(4)   | -0.0005(4)  |
| Al2  | 0.0152(6)  | 0.0167(5)  | 0.0137(5)  | -0.0002(4)  | 0.0024(4)   | 0.0010(4)   |
| S1   | 0.0181(5)  | 0.0252(5)  | 0.0146(4)  | -0.0009(3)  | 0.0005(3)   | 0.0000(4)   |
| S2   | 0.0627(9)  | 0.0212(5)  | 0.0310(6)  | 0.0013(4)   | 0.0162(5)   | 0.0046(5)   |
| S3   | 0.0180(5)  | 0.0223(5)  | 0.0143(4)  | 0.0001(3)   | 0.0001(3)   | 0.0021(4)   |
| O1   | 0.0203(15) | 0.0234(14) | 0.0181(13) | -0.002(1)   | 0.0006(11)  | 0.0023(11)  |
| O2   | 0.0201(16) | 0.0375(17) | 0.0186(14) | -0.0011(12) | 0.0045(12)  | -0.0049(13) |
| O3   | 0.0192(15) | 0.0187(13) | 0.0242(14) | 0.0037(11)  | -0.0017(12) | -0.0008(11) |
| O4   | 0.0288(17) | 0.0268(15) | 0.0161(13) | -0.0054(11) | -0.0002(12) | 0.0031(12)  |
| O5   | 0.0350(19) | 0.0259(16) | 0.0286(16) | 0.0068(12)  | 0.0102(14)  | 0.0063(13)  |
| O6   | 0.0261(17) | 0.0238(15) | 0.0303(16) | -0.0093(12) | 0.0013(13)  | -0.0002(12) |
| O7   | 0.0187(15) | 0.0353(17) | 0.0178(14) | 0.0035(11)  | 0.0043(11)  | 0.0062(12)  |
| O8   | 0.0245(16) | 0.0235(14) | 0.0146(13) | 0.0031(10)  | -0.0008(11) | -0.0003(11) |
| O9   | 0.0201(15) | 0.0196(14) | 0.0254(15) | -0.0055(11) | -0.0035(12) | 0.0019(11)  |
| O10  | 0.0223(16) | 0.0298(16) | 0.0216(14) | 0.0044(11)  | -0.0062(12) | 0.0083(12)  |
| O11  | 0.0222(16) | 0.0289(16) | 0.0253(15) | -0.0066(12) | 0.0093(12)  | -0.0090(12) |
| O12  | 0.0256(16) | 0.0238(15) | 0.0182(13) | 0.0041(11)  | -0.0006(12) | 0.0014(12)  |
| O13  | 0.0246(17) | 0.050(2)   | 0.0247(16) | -0.0126(14) | 0.0033(13)  | 0.0105(15)  |
| O14  | 0.0343(19) | 0.0303(17) | 0.0335(18) | -0.0119(14) | -0.0152(15) | 0.0071(14)  |
| O15  | 0.035(2)   | 0.041(2)   | 0.0259(16) | 0.0127(14)  | -0.0077(15) | -0.0147(15) |
| O16  | 0.0216(16) | 0.0424(19) | 0.0200(14) | 0.0046(13)  | 0.0047(12)  | -0.0046(13) |
| O17  | 0.080(4)   | 0.067(3)   | 0.084(4)   | 0.000(3)    | 0.049(3)    | 0.007(3)    |
| O18  | 0.071(3)   | 0.054(3)   | 0.047(2)   | -0.016(2)   | 0.004(2)    | 0.024(2)    |
| O19  | 0.080(4)   | 0.038(2)   | 0.075(3)   | 0.019(2)    | -0.012(3)   | -0.012(2)   |
| O20  | 0.116(4)   | 0.0253(18) | 0.041(2)   | -0.0020(16) | 0.037(3)    | 0.004(2)    |
| O21  | 0.0229(16) | 0.0328(16) | 0.0216(14) | -0.0069(12) | 0.0059(12)  | 0.0038(12)  |
| O22  | 0.0340(19) | 0.0271(16) | 0.0311(17) | 0.0108(13)  | -0.0114(15) | -0.0057(14) |
| O23  | 0.0214(16) | 0.0409(18) | 0.0215(15) | 0.0034(13)  | 0.0037(12)  | -0.0039(13) |
| O24  | 0.0317(19) | 0.0356(18) | 0.0236(15) | -0.0108(13) | -0.0053(14) | 0.0108(14)  |
| O25  | 0.053(5)   | 0.0130(7)  | 0.143(8)   | -0.022(6)   | -0.015(5)   | -0.025(4)   |
| O26  | 0.062(3)   | 0.048(3)   | 0.071(3)   | 0.007(2)    | 0.008(3)    | 0.013(2)    |
| O27  | 0.042(4)   | 0.083(5)   | 0.096(6)   | -0.045(4)   | 0.013(3)    | 0.003(3)    |
| O28  | 0.040(3)   | 0.033(3)   | 0.055(4)   | -0.008(3)   | 0.012(3)    | -0.010(3)   |
| O29  | 0.047(7)   | 0.050(7)   | 0.053(7)   | -0.009(6)   | 0.014(6)    | -0.022(6)   |
